# Supplementary material
Source: Springer Nature journal article supplement (https://www.springermedizin.de/resource/supplementary/12889_2010_2554_MOESM1_ESM.pdf/9486406)

No absence spells (n=442)

Long absence spells (n=209)

Short absence spells (n=1693)

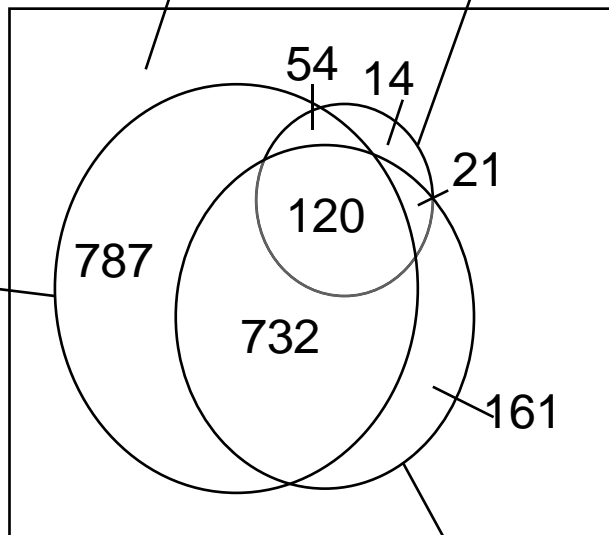

Medium absence spells (n=1034)

Supplement: MOESM1 [file 9486406]
